# Supplementary material
Source: publisher figshare collection journal article supplement (https://sage.figshare.com/ndownloader/files/12398936)
Supplement: Supplementary file 1 [file 12398936]

# Appendix A

**Table A1.** Questions Asked.

| Question | Women                                                                                                                                                                                                                                                                             | Men                                                                                      |
|----------|-----------------------------------------------------------------------------------------------------------------------------------------------------------------------------------------------------------------------------------------------------------------------------------|------------------------------------------------------------------------------------------|
| 1        | Does musculature affect your assessment of the attractiveness of a man?                                                                                                                                                                                                           | Do you think that musculature affects the assessment of a man's attractiveness by women? |
| 2        | Could a man's musculature encourage you to develop a relationship with him?                                                                                                                                                                                                       | Do you think musculature could encourage women to develop a relationship with a man?     |
| 3        | What is the most attractive degree of muscularity for you?                                                                                                                                                                                                                        | What do you think is the most attractive degree of muscularity for women?                |
| 4        | Are some groups of muscles more important than others?                                                                                                                                                                                                                            |                                                                                          |
| 5        | Please rate how important the following muscle groups are in relation to a man's attractiveness: chest, abdomen, biceps, shoulders, triceps, buttocks, back, forearms, calf, thighs-front, thighs-back, and neck (0–4 scale, where 0 = not important at all, 4 = most important). |                                                                                          |

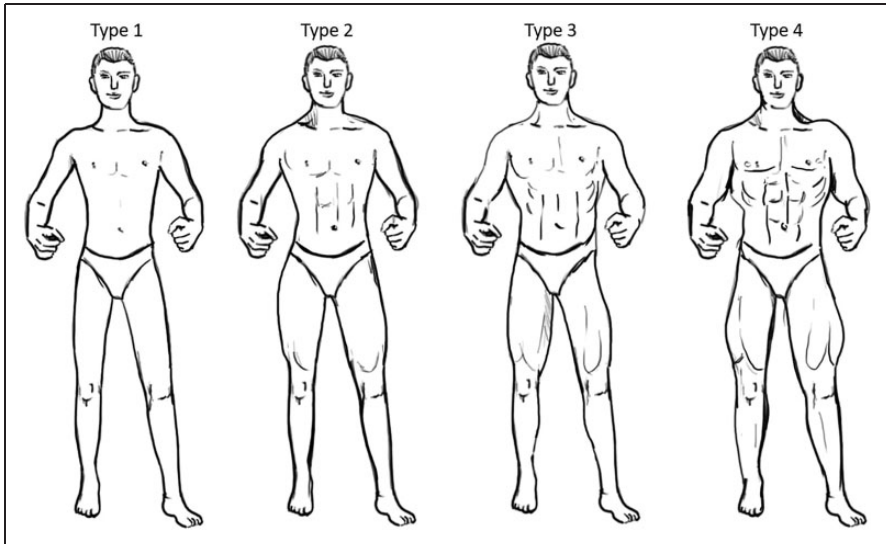

**Figure A1.** The Muscularity Scale used in the survey.

**Table A2.** The Response Statistics.

| Variable                                       | Women         | Men         |
|------------------------------------------------|---------------|-------------|
| Age                                            |               |             |
| Students                                       | 84.7% (3,426) | 80.0% (926) |
| Graduates                                      | 15.3% (617)   | 20.0% (231) |
| Field of studies                               |               |             |
| Human sciences                                 | 10.0% (405)   | 4.1% (47)   |
| Social                                         | 29.2% (1,182) | 21.3% (246) |
| Medical                                        | 35.4% (1,433) | 31.6% (366) |
| Agricultural                                   | 4.4% (179)    | 2.7% (31)   |
| Natural sciences                               | 4.7% (189)    | 3.0% (35)   |
| Exact sciences                                 | 5.5% (223)    | 6.8% (79)   |
| Technical                                      | 9.5% (385)    | 29.5% (341) |
| Artistic                                       | 1.2% (47)     | 1.0% (12)   |
| Village                                        | 27.5% (1,110) | 23.8% (275) |
| Place of residence before the start of studies |               |             |
| Town of 10k inhabitants                        | 7.5% (304)    | 7.7% (89)   |
| Town of 10k–100k inhabitants                   | 24.7% (998)   | 28.3% (328) |
| City 100k–500k inhabitants                     | 15.6% (631)   | 16.3% (189) |
| City over 500k inhabitants                     | 24.7% (1,000) | 23.9% (276) |
| BMI                                            |               |             |
| <18.5                                          | 15.2% (538)   | 2.7% (29)   |
| 18.5–24.99                                     | 77.7% (2,744) | 76.2% (816) |
| 25–29.99                                       | 6.5% (230)    | 20.4% (219) |
| >30                                            | 0.6% (22)     | 0.7% (7)    |

Note. BMI = body mass index.

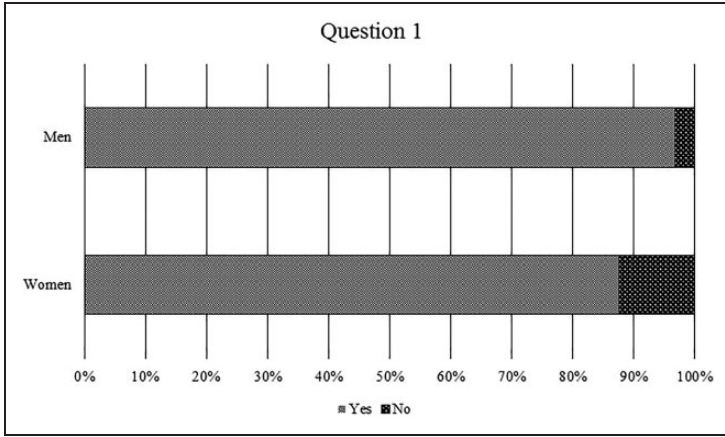

**Figure A2.** Comparison of survey answers between females and males (question 1).

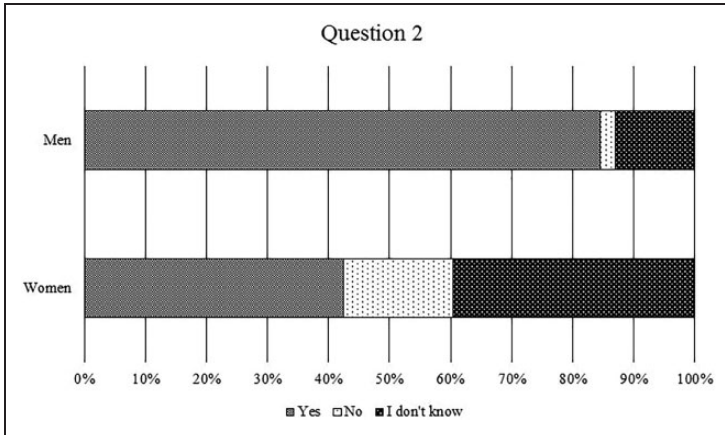

**Figure A3.** Comparison of survey answers between females and males (question 2).

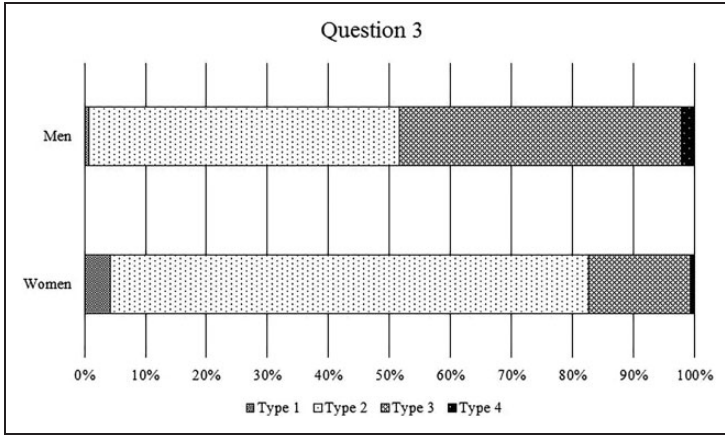

**Figure A4.** Comparison of survey answers between females and males (question 3).

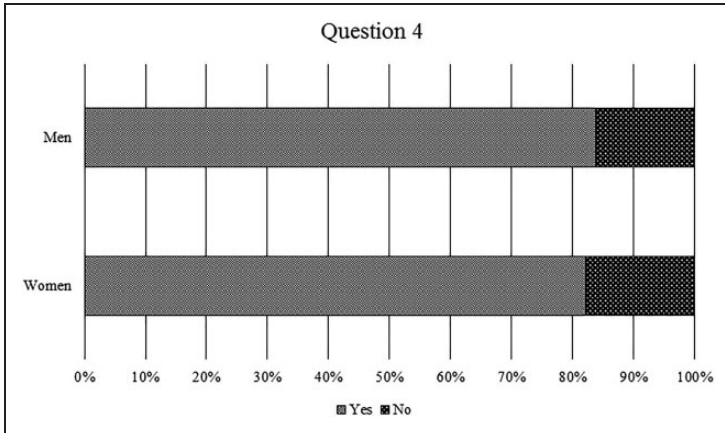

**Figure A5.** Comparison of survey answers between females and males (question 4).

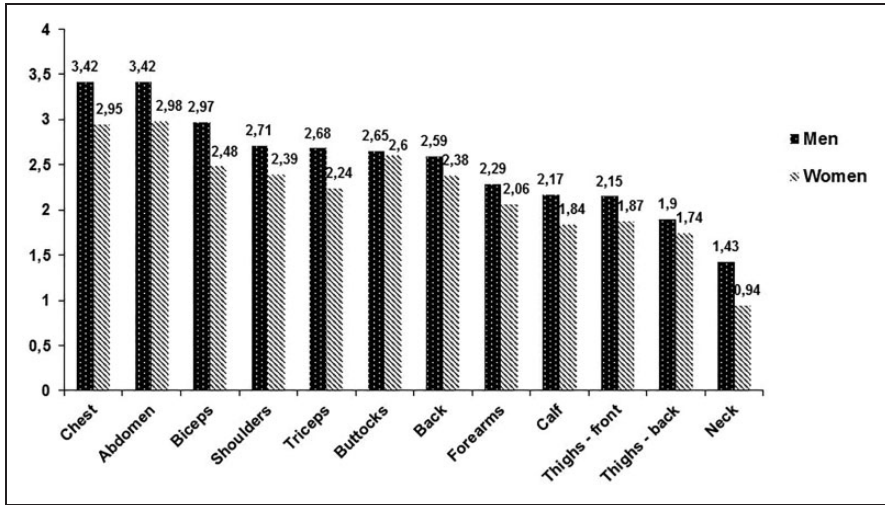

Figure A6. Muscles' ranking.
